# Supplementary material for: Mechanistic investigations on dimethyl carbonate formation by oxidative carbonylation of methanol over a CuY zeolite: an operandoSSITKA/DRIFTS/MS study
Source: Royal Society of Chemistry journal article supplement (doi:10.1039/c1cp23361k), 2011-11-02
Supplement: c1cp23361k.pdf [file c1cp23361k.pdf]

## Supplementary Information

# Mechanistic investigations on dimethyl carbonate formation by oxidative carbonylation of methanol over CuY zeolite: An *operando* SSITKA/DRIFTS/MS study

Jana Engeldinger, Manfred Richter and Ursula Bentrup\*

## Experimental

For the SSITKA experiments with  $^{16}\text{O}_2/^{18}\text{O}_2$  and  $^{12}\text{CO}/^{13}\text{CO}$  different gas dosing systems were used the detailed flow diagrams of which are shown in Fig. S1a, and S1b. The following gases and gas mixtures were used: 5 vol.%  $^{12}\text{CO}/\text{He}$ , 5 vol.%  $^{16}\text{O}_2/\text{He}$ , and 1 vol. %  $\text{Ne}/\text{He}$  (Air Liquide),  $^{13}\text{CO}$  (pure) and 5 vol.%  $^{18}\text{O}_2/\text{He}$  (Linde). MeOH was dosed using a saturator ( $14^\circ\text{C}$ ) with He (*cf.* Fig. S1a, b).

The general feed composition was 5.1 vol.% MeOH / 2.5 vol.% CO / 1.2 vol.%  $\text{O}_2$  balanced with He. In the experiments with Ne as marker the mixture additionally contained 0.2 vol.% Ne. The switching from the normal to the isotopic labelled gas mixture was done by a four-way valve realizing a constant flow rate of  $25\text{ ml min}^{-1}$ .

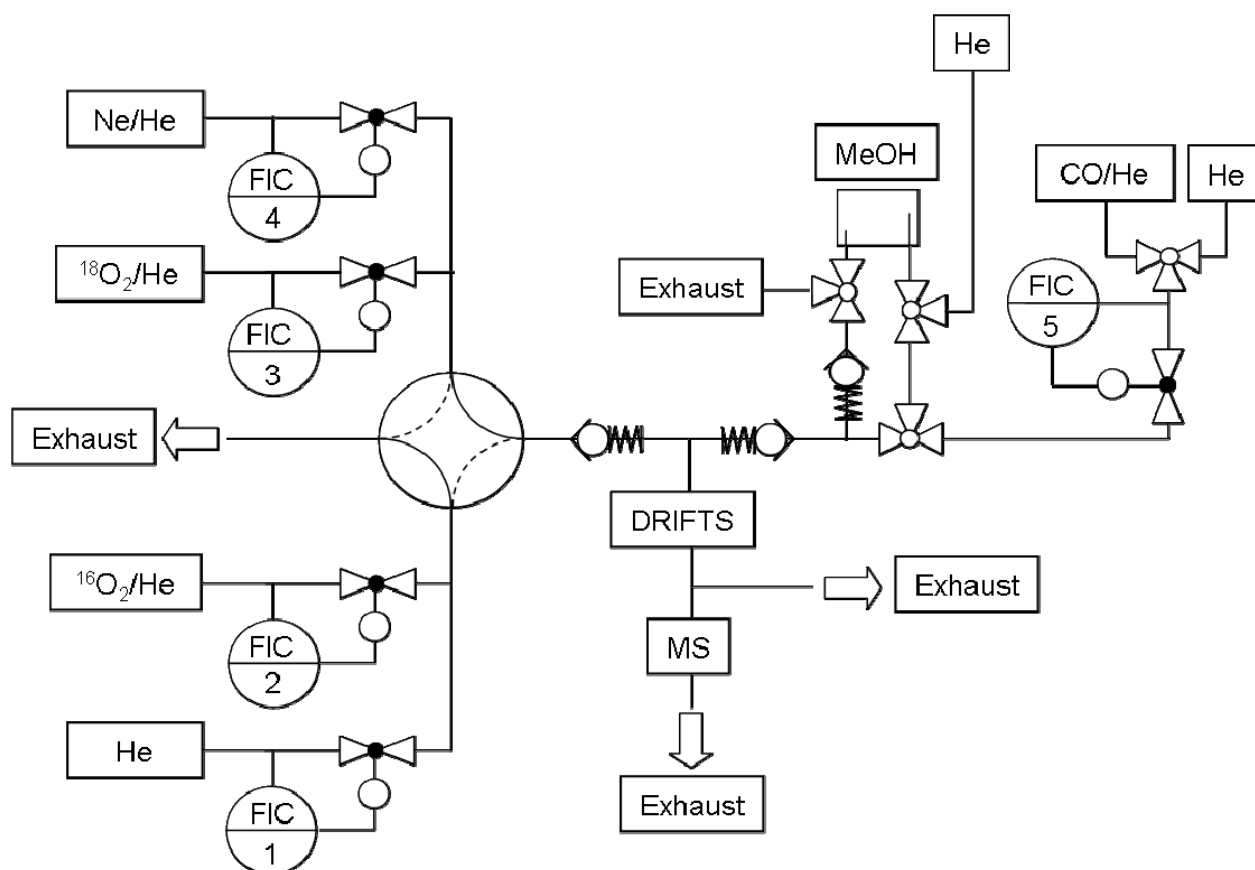

**Fig. S1a** Scheme of gas dosing system applied for SSITKA/DRIFTS/MS with  $^{16}\text{O}_2/^{18}\text{O}_2$ .

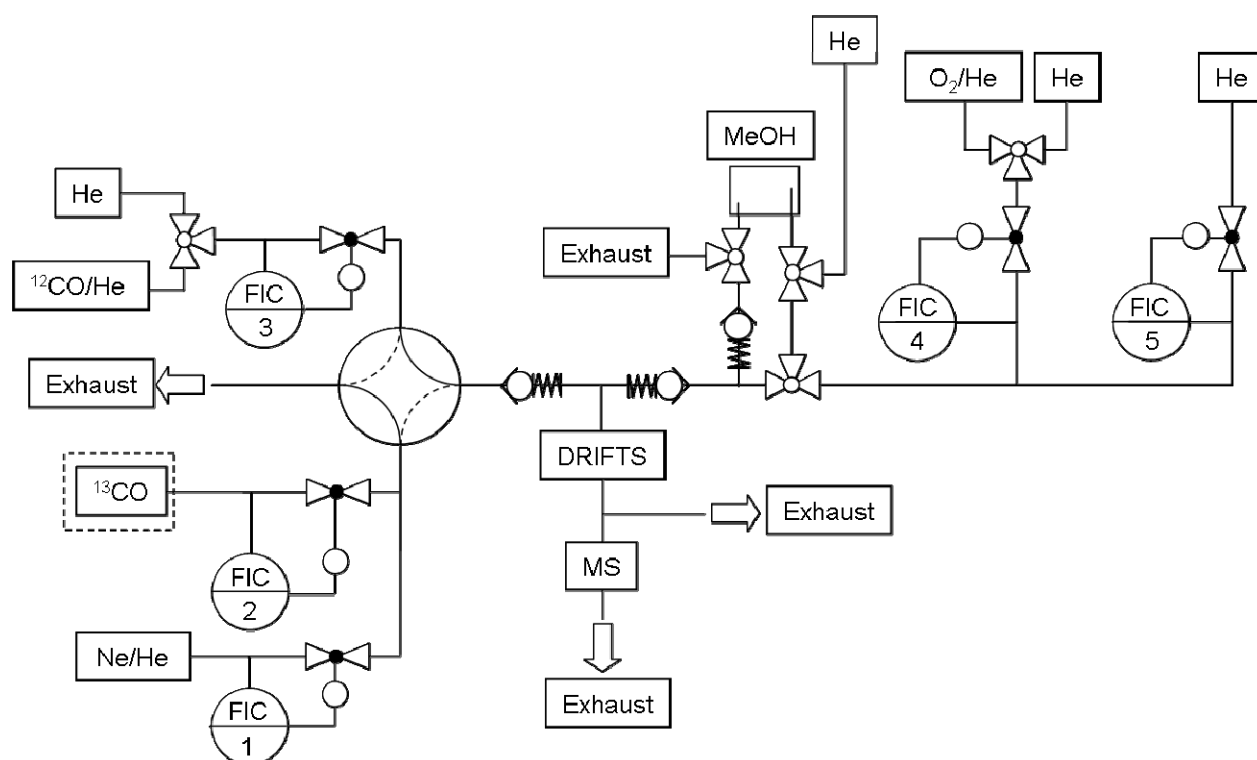

**Fig. S1b** Scheme of gas dosing system applied for SSITKA/DRIFTS/MS with  $^{12}\text{CO} / ^{13}\text{CO}$ .

### Interaction of the CuY catalyst with $^{16}\text{O}_2/^{18}\text{O}_2$

It was checked if the oxygen of the zeolite lattice or the  $\text{CuO}_x$  agglomerates can be exchanged with gaseous oxygen at reaction temperature of  $150^\circ\text{C}$ . If  $^{16}\text{O}_2$  is replaced by  $^{18}\text{O}_2$  under steady state conditions a simultaneous increase of the MS signals of  $^{18}\text{O}_2$  and the tracer Ne was observed 30 sec after switching whereas the MS signal intensity of  $^{16}\text{O}_2$  decreases in parallel (Fig. S2). Because no  $^{16}\text{O}^{18}\text{O}$  was detected an exchange between lattice oxygen of both the zeolite and oxidic Cu species with gas phase oxygen can be excluded.

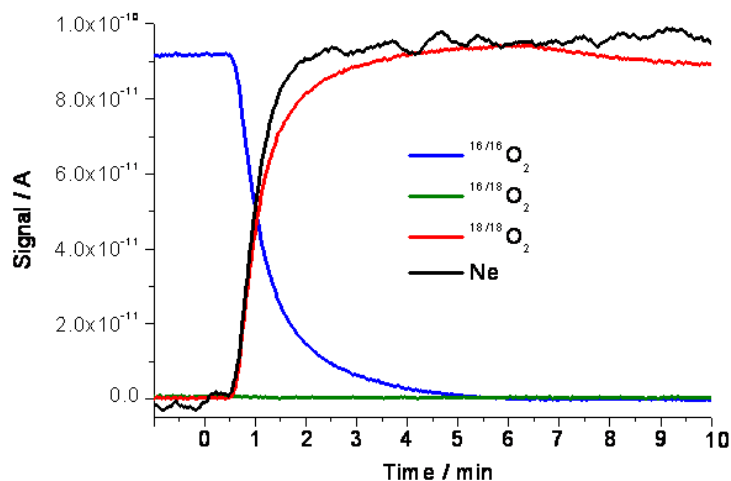

**Fig. S2** MS signal intensities of  $^{16}/^{16}\text{O}_2$ ,  $^{16}/^{18}\text{O}_2$ ,  $^{18}/^{18}\text{O}_2$  and the tracer Ne versus time; switching from  $^{16}\text{O}_2$  to  $^{18}\text{O}_2$  at time = 0.

### Interaction of the CuY catalyst with $^{12}\text{CO}/^{13}\text{CO}$

After switching from the  $^{12}\text{CO}/\text{He}$  to the  $^{13}\text{CO}/\text{He}$  gas mixture the DRIFT spectra shown in Fig. S3a were obtained. The bands at 2160/2144/2112  $\text{cm}^{-1}$  obtained after 30 min exposure to the  $^{12}\text{CO}/\text{He}$  feed are assigned to  $\text{Cu(I)}-^{12}\text{CO}$  modes of  $\text{Cu(I)}$  carbonyls at different sites. After switching to  $^{13}\text{CO}/\text{He}$  a rapid intensity decrease of these bands is observed accompanied by the appearance of new ones at 2110/2097/2062  $\text{cm}^{-1}$ . The analysis of the respective integral band intensities (*cf.* Fig. S3a) in dependence on time demonstrates the quick  $^{12}\text{CO}/^{13}\text{CO}$  exchange (Fig. S3b).

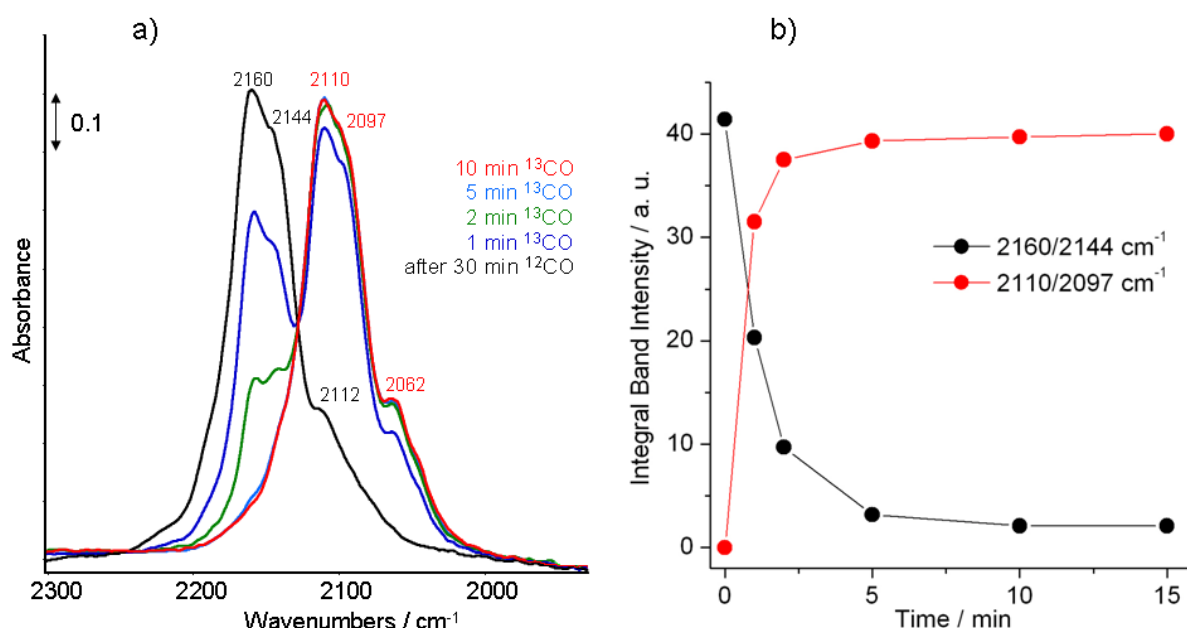

**Fig. S3** a) DRIFT spectra of adsorbed CO on 13CuY at 150°C after 30 min exposure to 2.5 vol.%  $^{12}\text{CO}/\text{He}$  and subsequent switching to 2.5 vol.%  $^{13}\text{CO}/\text{He}$ ; b) Integral intensities of the  $\text{Cu(I)}-^{12}\text{CO}$  (2160/2144  $\text{cm}^{-1}$ ) and  $\text{Cu(I)}-^{13}\text{CO}$  (2110/2097  $\text{cm}^{-1}$ ) bands versus time calculated from the measured DRIFT spectra.

### Comparing the interaction of the CuY catalyst with $\text{MeOH}/\text{CO}$ and $\text{MeOH}/\text{CO}/\text{O}_2$

Comparing the amounts of MF, DMC, and  $\text{CO}_2$  formed during 120 min exposure the catalyst to 5.1 vol.%  $\text{MeOH}/2.5$  vol.%  $^{12}\text{CO}/\text{He}$  and to 5.1 vol.%  $\text{MeOH}/2.5$  vol.%  $^{12}\text{CO}/1.2$  vol.%  $\text{O}_2/\text{He}$  at 150°C it is clearly seen that CO oxidation is preferred in the presence of oxygen (Fig. S4). The formation of DMC is lowered while the increased MF formation points to a higher extent of unselective  $\text{MeOH}$  oxidation. In the absence of oxygen ( $\text{MeOH}/\text{CO}/\text{He}$  feed) the MF formation proceeds by participation of lattice oxygen supplied by  $\text{CuO}_x$ . Because no additional oxygen is dosed the MF formation decreases with time.

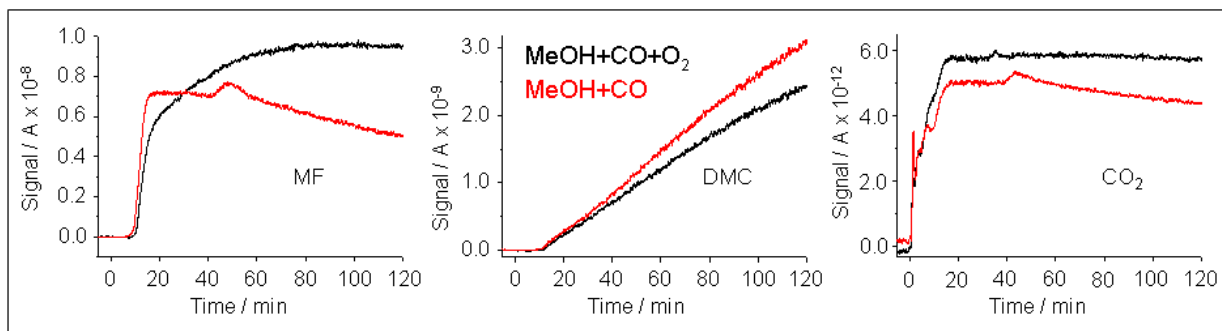

**Fig. S4** MS signal intensities of MF, DMC, and CO<sub>2</sub> versus time measured during 120 min exposure the catalyst to a 5.1 vol.% MeOH/2.5 vol.% <sup>12</sup>CO/He feed and to 5.1 vol.% MeOH/2.5 vol.% <sup>12</sup>CO/1.2 vol.% O<sub>2</sub>/He feed at 150°C, respectively.
